# Supplementary material for: Molecular Epidemiology of Neonatal-Associated Staphylococcus haemolyticus Reveals Endemic Outbreak
Source: PubMed Central journal article supplement (PMC9769988; doi:10.1128/spectrum.02452-22), 2022-10-31
Supplement: spectrum.02452-22-s0001.pdf [file spectrum.02452-22-s0001.pdf]

Table S1. All investigated resistance- and virulence genes in the 34 *S. haemolyticus* isolates. P-values calculated with Fisher's exact test, comparing the outbreak clone to the non-outbreak isolates. Virulence genes previously associated with clinical *S. haemolyticus* isolates (1).

| Gene                    | Function/resistance | Outbreak clone<br>n (%) | Non-outbreak isolates<br>n (%) | p-value |
|-------------------------|---------------------|-------------------------|--------------------------------|---------|
| <b>Resistance genes</b> |                     |                         |                                |         |
| <i>aac(6')-aph(2'')</i> | aminoglycoside      | 20 (100)                | 10 (71)                        | 0.022   |
| <i>aadD</i>             | aminoglycoside      | 0                       | 1 (7)                          | 0.412   |
| <i>ant(9)-Ia</i>        | aminoglycoside      | 0                       | 1 (7)                          | 0.412   |
| <i>aph(3')-III</i>      | aminoglycoside      | 0                       | 0                              | 1       |
| <i>str</i>              | aminoglycoside      | 0                       | 0                              | 1       |
| <i>qacB</i>             | antiseptic          | 0                       | 0                              | 1       |
| <i>blaZ</i>             | $\beta$ -lactam     | 20 (100)                | 14 (100)                       | 1       |
| <i>cat (pC221)</i>      | chloramphenicol     | 0                       | 4 (29)                         | 0.022   |
| <i>qacA</i>             | disinfectant        | 17 (85)                 | 12 (86)                        | 1       |
| <i>fusB</i>             | fusidic acid        | 0                       | 4 (29)                         | 0.022   |
| <i>fusC</i>             | fusidic acid        | 0                       | 1 (7)                          | 0.412   |

|                 |                                  |          |         |       |
|-----------------|----------------------------------|----------|---------|-------|
| <i>lnuA</i>     | lincosamide                      | 0        | 2 (14)  | 0.162 |
| <i>lsaA</i>     | lincosamides and streptogramin a | 0        | 0       | 1     |
| <i>ermA</i>     | macrolide                        | 0        | 1 (7)   | 0.412 |
| <i>ermC</i>     | macrolide                        | 0        | 1 (7)   | 0.412 |
| <i>mphC</i>     | macrolide                        | 18 (90)  | 7 (50)  | 0.017 |
| <i>vga(A)LC</i> | macrolide                        | 0        | 2 (14)  | 0,162 |
| <i>msrA</i>     | macrolide                        | 18 (90)  | 7 (50)  | 0.017 |
| <i>mecA</i>     | methicillin                      | 20 (100) | 11 (79) | 0.061 |
| <i>tet(K)</i>   | tetracycline                     | 0        | 4 (29)  | 0.022 |
| <i>tet(M)</i>   | tetracycline                     | 0        | 1 (7)   | 0.412 |
| <i>dfpG</i>     | trimethoprim                     | 0        | 3 (21)  | 0.061 |
| <b>MDR</b>      |                                  | 20 (100) | 13 (93) | 0.412 |

### Virulence genes

|             |                                             |          |         |       |
|-------------|---------------------------------------------|----------|---------|-------|
| <i>ugpQ</i> | Glycerophosphoryl diester phosphodiesterase | 20 (100) | 11 (79) | 0.061 |
| <i>paaZ</i> | Domain protein                              | 20 (100) | 11 (79) | 0.061 |

|                  |                                       |          |          |       |
|------------------|---------------------------------------|----------|----------|-------|
| <i>mecA</i>      | Methicillin resistance                | 20 (100) | 11 (79)  | 0.061 |
| <i>SH0155_NA</i> | MFS transporter                       | 20 (100) | 14 (100) | 1     |
| <i>nikA</i>      | Nickel-binding periplasmic protein    | 20 (100) | 14 (100) | 1     |
| <i>secA2</i>     | Protein translocase subunit seca2     | 20 (100) | 13 (93)  | 0.412 |
| <i>fabG</i>      | Fabg                                  | 20 (100) | 13 (93)  | 0.412 |
| <i>yjgG</i>      | Pyrimidine 5'-nucleotidase yjgG       | 20 (100) | 14 (100) | 1     |
| <i>ansA</i>      | Putative L-asparaginase               | 20 (100) | 14 (100) | 1     |
| <i>aacA-aphD</i> | Bifunctional AAC/APH                  | 20 (100) | 10 (71)  | 0.022 |
| <i>SH1612_NA</i> | Acetyltransferase GNAT                | 20 (100) | 10 (71)  | 0.022 |
| <i>blaI</i>      | Penicillinase repressor               | 20 (100) | 13 (93)  | 0.412 |
| <i>blaR1</i>     | Regulatory protein blaR1              | 20 (100) | 12 (86)  | 0.162 |
| <i>blaZ</i>      | B-lactamase                           | 20 (100) | 14 (100) | 1     |
| <i>SH2156_NA</i> | Ferrichrome ABC transporter truncated | 20 (100) | 13 (93)  | 0.412 |
| <i>tagE</i>      | Truncated glycosyltransferase         | 20 (100) | 13 (93)  | 0.412 |

---

|                  |                                      |          |         |        |
|------------------|--------------------------------------|----------|---------|--------|
| <i>folB</i>      | Dihydroneopterin<br>aldolase         | 20 (100) | 8 (57)  | 0.002  |
| <i>folP</i>      | Dihydropteroate<br>synthase          | 20 (100) | 9 (64)  | 0.007  |
| <i>SH2607_NA</i> | ATP-binding protein<br>(plasmid)     | 20 (100) | 4 (29)  | <0.001 |
| <i>sraP</i>      | Serine-rich adhesin for<br>platelets | 20 (100) | 13 (93) | 0.412  |

---

*Table S2. Frequency of combinations of antibiotic resistance phenotype, genotype and virulence seen in the 34 S. haemolyticus isolates.*

| <b>Combination</b> | <b>Antibiotic resistance phenotype</b>                                                                                             | <b>Outbreak clone n (%)</b> | <b>Non-outbreak isolates n (%)</b> |
|--------------------|------------------------------------------------------------------------------------------------------------------------------------|-----------------------------|------------------------------------|
| <b>1</b>           | Aminoglycoside, Methicillin, $\beta$ -lactam, Macrolide                                                                            | 16 (80)                     | 5 (36)                             |
| <b>2</b>           | Aminoglycoside, Methicillin, $\beta$ -lactam                                                                                       | 2 (10)                      | 0 (0)                              |
| <b>3</b>           | Aminoglycoside, Methicillin, $\beta$ -lactam, Macrolide, Trimethoprim-sulfamethoxazole                                             | 2 (10)                      | 0 (0)                              |
| <b>4</b>           | Fusidic acid, $\beta$ -lactam                                                                                                      | 0 (0)                       | 1 (7)                              |
| <b>5</b>           | Aminoglycoside, Methicillin, $\beta$ -lactam, Fluoroquinolone                                                                      | 0                           | 1 (7)                              |
| <b>6</b>           | Aminoglycoside, Methicillin, $\beta$ -lactam, Fusidic acid                                                                         | 0                           | 1 (7)                              |
| <b>7</b>           | Aminoglycoside, Methicillin, $\beta$ -lactam, Fluoroquinolone, Fusidic acid, Lincosamide, Macrolide, Trimethoprim-sulfamethoxazole | 0                           | 2 (14)                             |
| <b>8</b>           | Macrolide, $\beta$ -lactam                                                                                                         | 0                           | 1 (7)                              |
| <b>9</b>           | Methicillin, $\beta$ -lactam                                                                                                       | 0                           | 1 (7)                              |
| <b>10</b>          | Aminoglycoside, Methicillin, $\beta$ -lactam, Fluoroquinolone, Lincosamide, Macrolide, Trimethoprim-sulfamethoxazole               | 0                           | 1 (7)                              |
| <b>11</b>          | $\beta$ -lactam                                                                                                                    | 0                           | 1 (7)                              |

| <b>Combination</b> | <b>Antibiotic resistance genotype</b>                                                                                                                                                                   | <b>Outbreak clone<br/>n (%)</b> | <b>Non-outbreak<br/>isolates<br/>n (%)</b> |
|--------------------|---------------------------------------------------------------------------------------------------------------------------------------------------------------------------------------------------------|---------------------------------|--------------------------------------------|
| 1                  | <i>aac(6')-aph(2'')</i> , <i>blaZ</i> , <i>qacA</i> ,<br><i>mphC</i> , <i>msrA</i> , <i>mecA</i>                                                                                                        | 15 (75)                         | 4 (29)                                     |
| 2                  | <i>aac(6')-aph(2'')</i> , <i>blaZ</i> , <i>mphC</i> ,<br><i>msrA</i> , <i>mecA</i>                                                                                                                      | 3 (15)                          | 0                                          |
| 3                  | <i>aac(6')-aph(2'')</i> , <i>blaZ</i> , <i>qacA</i> , <i>mecA</i>                                                                                                                                       | 2 (10)                          | 0                                          |
| 4                  | <i>blaZ</i> , <i>qacA</i>                                                                                                                                                                               | 0 (0)                           | 1 (7)                                      |
| 5                  | <i>aadD</i> , <i>blaZ</i> , <i>cat</i> (pC221), <i>qacA</i> ,<br><i>fusB</i>                                                                                                                            | 0                               | 1 (7)                                      |
| 6                  | <i>aac(6')-aph(2'')</i> , <i>blaZ</i> , <i>mecA</i> ,<br><i>tet(M)</i>                                                                                                                                  | 0                               | 1 (7)                                      |
| 7                  | <i>aac(6')-aph(2'')</i> , <i>blaZ</i> , <i>cat</i><br>(pC221), <i>qacA</i> , <i>fusB</i> , <i>lsaA</i> , <i>mphC</i> ,<br><i>vga(A)LC</i> , <i>msrA</i> , <i>mecA</i> , <i>tet(K)</i> ,<br><i>dfi-G</i> | 0                               | 2 (14)                                     |
| 8                  | <i>aac(6')-aph(2'')</i> , <i>blaZ</i> , <i>cat</i><br>(pC221), <i>qacA</i> , <i>mecA</i> , <i>tet(K)</i>                                                                                                | 0                               | 1 (7)                                      |
| 9                  | <i>aph(3')-III</i>                                                                                                                                                                                      | 0                               | 1 (7)                                      |
| 10                 | <i>blaZ</i> , <i>qacA</i> , <i>mecA</i> , <i>tet(K)</i>                                                                                                                                                 | 0                               | 1 (7)                                      |
| 11                 | <i>aac(6')-aph(2'')</i> , <i>blaZ</i> , <i>qacA</i> , <i>fusB</i> ,<br><i>fusc</i> , <i>mecA</i>                                                                                                        | 0                               | 1 (7)                                      |
| 12                 | <i>aac(6')-aph(2'')</i> , <i>blaZ</i> , <i>qacA</i> ,<br><i>ermC</i> , <i>mphC</i> , <i>msrA</i> , <i>mecA</i> , <i>dfi-G</i>                                                                           | 0                               | 1 (7)                                      |

| <b>Combination</b> | <b>Virulence</b>                                                                                                                                       | <b>Outbreak clone<br/>n (%)</b> | <b>Non-outbreak<br/>isolates<br/>n (%)</b> |
|--------------------|--------------------------------------------------------------------------------------------------------------------------------------------------------|---------------------------------|--------------------------------------------|
| <b>1</b>           | All 20 virulence genes (Table S1)                                                                                                                      | 20 (100)                        | 2 (14)                                     |
| <b>2</b>           | All virulence genes except<br><i>SH2607_NA</i> (Table S1)                                                                                              | 0                               | 5 (36)                                     |
| <b>3</b>           | All virulence genes except <i>folB</i><br>(Table S1)                                                                                                   | 0                               | 1 (7)                                      |
| <b>4</b>           | <i>SH0155_NA, nikA, yjjG, ansA,<br/>blaZ, SH2156_NA</i>                                                                                                | 0                               | 1 (7)                                      |
| <b>5</b>           | <i>SH0155_NA, nikA, secA2, fabG,<br/>yjjG, ansA, blaI, blaR1, blaZ,<br/>SH2156_NA, tagE, sraP</i>                                                      | 0                               | 2 (14)                                     |
| <b>6</b>           | <i>ugpQ, paaZ, mecA, SH0155_NA,<br/>nikA, secA2, fabG, yjjG, ansA,<br/>aacA-aphD, SH1612_NA, blaI,<br/>blaR1, blaZ, SH2156_NA, tagE,<br/>sraP</i>      | 0                               | 1 (7)                                      |
| <b>7</b>           | <i>ugpQ, paaZ, mecA, SH0155_NA,<br/>nikA, secA2, fabG, yjjG, ansA,<br/>aacA-aphD, SH1612_NA, blaI,<br/>blaZ, tagE, folB, folP,<br/>SH2607_NA, sraP</i> | 0                               | 1 (7)                                      |
| <b>8</b>           | <i>ugpQ, paaZ, mecA, SH0155_NA,<br/>nikA, secA2, fabG, yjjG, ansA,<br/>blaI, blaR1, blaZ, SH2156_NA,<br/>tagE, sraP</i>                                | 0                               | 1 (7)                                      |

### **Supplementary reference**

1. Pain M, Hjerde E, Klingenberg C, Cavanagh JP. 2019. Comparative Genomic Analysis of *Staphylococcus haemolyticus* Reveals Key to Hospital Adaptation and Pathogenicity. *Front Microbiol* 10:2096.
